# Supplementary material for: A highly advantageous metal-free approach to diaryl disulfides in water
Source: Royal Society of Chemistry journal article supplement (doi:10.1039/b614623f), 2007-01-01
Supplement: b614623f.doc [file b614623f.doc]

# Supplementary Material (ESI) for Green Chemistry

# # This journal is © The Royal Society of Chemistry 2007

# A Highly Advantageous Metal-Free Approach to Diaryl Disulfides in Water

Mónica Carril, Raul SanMartin, Esther Domínguez and Imanol Tellitu

# Electronic Supplementary Information

**General Remarks**. All the thiophenols were purchased from Aldrich and used without further purification. The ammonia aqueous solution (32%) was purchased from Scharlau. Redistilled water was employed in all reactions. TLC was carried out on SiO2 (silica gel 60 F254, Merck), and the spots were located with UV light. Drying of organic extracts after work-up of reactions was performed over anhydrous Na2SO4. 1H and 13C spectra were recorded in CDCl3 solution in a Bruker AC-300 and chemical shifts are reported in ppm downfield (δ) from Me4Si. Low and high resolution mass spectra were performed by the Mass Spectroscopy Section of the University of the Basque Country (UPV/EHU).

**Experimental procedure for the synthesis of disulfides 2**.

**Diphenyl disulfide 2a**.[[1]](#footnote-2) *Typical procedure*: A schlenck flask was charged with thiophenol (0.1 ml, 0.94 mmol), a 32% aqueous solution of NH3 (0.15 ml) and water (6ml). The schlenk was sealed and the mixture was stirred at room temperature for 2 hours. The crude mixture was filtered to afford disulfide **2a** (99.7 mg, 97%) as a white solid. *δ*H(300 MHz, CDCl3, Me4Si) 7.22-7.35 (6H, m, Harom), 7.53 (4H, d, *J* 7.43, Harom); *δ*C(75 MHz, CDCl3, Me4Si) 126.9, 127.3, 128.9, 136.8; *m/z* (EI) (Found: 218.0228. C12H10S2 requires: 218.0224) 218 (M, 100), 185 (14), 154 (14), 109 (95).

**Di(2-naphthyl) disulfide 2b**.[[2]](#footnote-3) The typical procedure was followed employing 2-thionaphthol (161.9 mg, 1 mmol). The reaction was performed at 120°C for 4 hours and the crude mixture was filtered to afford disulfide **2b** (134.5 mg, 85%) as a beige solid. *δ*H(300 MHz, CDCl3, Me4Si) 7.49-7.45 (4H, m, Harom), 7.65 (2H, d, *J* 8.66, Harom), 7.82-7.73 (6H, m, Harom), 8.01 (2H, s, Harom); *δ*C(75 MHz, CDCl3, Me4Si) 125.6, 126.2, 126.5, 126.7, 127.4, 127.7, 128.9, 132.4, 133.4, 134.2; *m/z* (EI) (Found: 318.0544. C20H14S2 requires: 318.0537) 318 (M, 12), 254 (16), 159 (40), 115 (100).

**Di(4-methoxyphenyl) disulfide 2c**.[[3]](#footnote-4) The typical procedure was followed employing 4-methoxythiophenol (0.13 ml, 1.04 mmol). The reaction was performed at 120°C for 4 hours and the crude mixture was extracted with dichloromethane to afford disulfide **2c** (139.7 mg, 97%) as a colourless liquid. *δ*H(300 MHz, CDCl3, Me4Si) 3,80 (6H, s, OCH3), 6.84 (4H, d, *J* 8.79, Harom), 7.40 (4H, d, *J* 8.79, Harom); *δ*C(75 MHz, CDCl3, Me4Si) 55,3, 114,6, 128,4, 132,6, 159,9; *m/z* (EI) (Found: 278.0438. C14H14O2S2 requires: 278.0435) 278 (M, 66), 139 (100), 96 (14).

**Di(4-chlorophenyl) disulfide 2d**.[[4]](#footnote-5) The typical procedure was followed employing 4-chlorothiophenol (151.9 mg, 1.05 mmol). The reaction was performed at 120°C for 4 hours and the crude mixture was filtered to afford disulfide **2d** (149.0 mg, 99%) as a white solid. *δ*H(300 MHz, CDCl3, Me4Si) 7.28 (4H, d, *J* 8.55, Harom), 7.41 (4H, d, *J* 8.55, Harom); *δ*C(75 MHz, CDCl3, Me4Si) 129.2, 133.5, 135.1; *m/z* (EI) (Found: 285.9452. C12H8S2Cl2 requires: 285.9444 ) 290 (M +4, 3), 288 (M+2, 20), 286 (M, 32), 143 (100), 108 (66), 99 (13).

**Di(4-nitrophenyl) disulfide 2e**.[[5]](#footnote-6) The typical procedure was followed employing 4-nitrothiophenol (196.0 mg, 1.01 mmol). The reaction was performed at room temperature for 4 hours and the crude mixture was filtered to afford disulfide **2e** (133.7 mg, 86%) as a yellow solid. *δ*H(300 MHz, CDCl3, Me4Si) 7.61 (4H, d, *J* 8.92, Harom), 8.19 (4H, d, *J* 8.89, Harom); *δ*C(75 MHz, CDCl3, Me4Si) 124.4, 126.3, 144.0, 146.9; *m/z* (EI) (Found: 307.9930. C12H8N2O4S2 requires: 307.9926) 308 (M, 100), 278 (11), 140 (11), 138 (18), 108 (61).

**Di(4-methylphenyl) disulfide 2f.**[[6]](#footnote-7)The typical procedure was followed employing 4-methylthiophenol (156.4 mg, 1.23 mmol). The reaction was performed at 120°C for 4 hours and the crude mixture was filtered to afford disulfide **2f** (144.9 mg, 95%) as a yellow solid. *δ*H(300 MHz, CDCl3, Me4Si) 2.38 (6H, s, CH3), 7.16 (4H, d, *J* 7.92, Harom), 7.46 (4H, d, *J* 8.07, Harom); *δ*C(75 MHz, CDCl3, Me4Si) 20.9, 128.4, 129.7, 133.8, 137.3; *m/z* (EI) (Found: 246.0541. C14H14S2 requires: 246.0537) 246 (M, 87), 123 (100), 79 (15).

**Di(3-methoxyphenyl) disulfide 2g**.[[7]](#footnote-8) The typical procedure was followed employing 3-methoxythiophenol (0.13 ml, 1.03 mmol). The reaction was performed at 120°C for 4 hours and the crude mixture was extracted with dichloromethane to afford disulfide **2g** (133 mg, 93%) as a yellow oil. *δ*H(300 MHz, CDCl3, Me4Si) 3.78 (6H, s, OCH3), 6.79 (2H, d, *J* 7.46, Harom), 7.11-7.14 (4H, m, Harom), 7.24 (2H, t, *J* 8.17, Harom); *δ*C(75 MHz, CDCl3, Me4Si) 55.1, 112.4, 112.9, 119.4, 129.8, 138.1, 159.9; *m/z* (EI) (Found: 278.0422. C14H14O2S2 requires: 278.0435) 278 (M, 100), 245 (22), 230 (189, 214 (18), 139 (21), 124 (18), 95 (20).

**Di(3-methylphenyl) disulfide 2h.**[[8]](#footnote-9)The typical procedure was followed employing 3-methylthiophenol (0.13 ml, 1.04 mmol). The reaction was performed at 120°C for 4 hours and the crude mixture was was extracted with dichloromethane to afford disulfide **2h** (127 mg, 99.5%) as a yellow liquid. *δ*H(300 MHz, CDCl3, Me4Si) 2.38 (3H, s), 7.08 (2H, d, *J* 7.47, Harom), 7.25 (2H, t, *J* 7.92, Harom), 7.36-7.40 (4H, m, Harom); *δ*C(75 MHz, CDCl3, Me4Si) 21.3, 124.4, 127.8, 127.9, 128.8, 136.8, 138.8; *m/z* (EI) (Found: 246.0545. C14H14S2 requires: 246.0537) 246 (M, 100), 213 (16), 198 (10), 182 (19), 123 (90), 79 (15).

**Bis(2,6-dimethylphenyl) disulfide 2i.**[[9]](#footnote-10)The typical procedure was followed employing 2,6-dimethylthiophenol (0.14 ml, 1.00 mmol). The reaction was performed at 120°C for 4 hours and the crude mixture was filtered to afford disulfide **2i** (134.5 mg, 98%) as a yellow solid. *δ*H(300 MHz, CDCl3, Me4Si) 2.28 (12H, s, CH3), 7.03-7.06 (4H, m, Harom), 7.14 (2H, dd, *J* 8.22, 6.63, Harom); *δ*C(75 MHz, CDCl3, Me4Si) 21.4, 127.9, 129.2, 134.6, 143.3; *m/z* (EI) (Found: 246.0545. C14H14S2 requires: 246.0537) 246 (M, 100), 213 (16), 198 (10), 182 (19), 123 (90), 79 (15).

**Di(2-aminophenyl) disulfide 2j.**[[10]](#footnote-11)The typical procedure was followed employing 2-aminothiophenol (0.11 ml, 1.02 mmol). The reaction was performed at room temperature for 2 hours and the crude mixture was filtered to afford disulfide **2j** (95.8 mg, 76%) as a yellow solid. *δ*H(300 MHz, CDCl3, Me4Si) 4.33 (4H, s, NH2), 6.59 (2H, t, *J* 7.48, Harom), 6.66-6.74 (2H, m, Harom), 7.13-7.19 (4H, m, Harom); *δ*C(75 MHz, CDCl3, Me4Si) 115.2, 118.2, 131.6, 136.8, 148.6; *m/z* (EI) (Found: 248.0444. C12H12N2S2 requires: 248.0442) 248 (M, 19), 124 (100), 97 (11), 80 (52).

**Di(2-pyridinyl) disulfide 2k.Error: Reference source not found** The typical procedure was followed employing 2-mercaptopyridine (122.2 mg, 1.09 mmol). The reaction was performed at room temperature for 2 hours and the crude mixture was filtered to afford disulfide **2k** (99.3 mg, 83%) as a yellow solid. *δ*H(300 MHz, CDCl3, Me4Si) 6.73 (2H, t, *J* 6.49, Harom), 7.31-7.37 (2H, m, Harom), 7.47-7.57 (4H, m, Harom); *δ*C(75 MHz, CDCl3, Me4Si) 113.9, 133.6, 136.7, 137.8, 176.4; *m/z* (EI) (Found: 220.0120. C10H8N2S2 requires: 220.0129) 220 (M, 100), 156 (68), 83 (12), 78 (60).

**Di(4-pyridinyl) disulfide 2l.**[[11]](#footnote-12)The typical procedure was followed employing 4-mercaptopyridine (120.1 mg, 1.03 mmol). The reaction was performed at 120°C for 7 hours and the crude mixture was extracted with dichloromethane to afford disulfide **2l** (99.6 mg, 88%) as an orange oil. *δ*H(300 MHz, CDCl3, Me4Si) 7.17 (4H, d, *J* 6.05, Harom), 8.46 (4H, d, *J* 6.01, Harom); *δ*C(75 MHz, CDCl3, Me4Si) 124.6, 143.8, 150.1.

| **2a** |
| --- |
|  |

| **2b** |
| --- |
|  |

| **2c** |
| --- |
|  |

| **2d** |
| --- |
|  |

| **2e** |
| --- |
|  |

| **2f** |
| --- |
|  |

| **2g** |
| --- |
|  |

| **2h** |
| --- |
|  |

| **2i** |
| --- |
|  |

| **2j** |
| --- |
|  |

| **2k** |
| --- |
|  |

| **2l** |
| --- |
|  |

1. R. Leino, J. –E. Loennqvist, *Tetrahedron Lett*. 2004, **45**, 8489. [↑](#footnote-ref-2)
2. A. Khazaei, M. A. Zolfigol, A. Rostami, *Synthesis* 2004, 2959. [↑](#footnote-ref-3)
3. G. Palumbo, R. Caputo, *Synthesis* 1981, 888. [↑](#footnote-ref-4)
4. X. Huang, C. C. Chan, *Synthesis* 1982, 1091. [↑](#footnote-ref-5)
5. F. –E. Chen, Y. –W. Lu, Y. –P. He, Y. –F. Luo, M. –G. Yan, *Synth Commun*. 2002, **32**, 3487. [↑](#footnote-ref-6)
6. R. S. Sengar, V. N. Nemykin, P. Basu, *New J. Chem*. 2003, **27**, 1115. [↑](#footnote-ref-7)
7. C. N. Yiannios, J. V. Karabinos, *J. Org. Chem*. 1963, **28**, 3246. [↑](#footnote-ref-8)
8. W. E. Fristad, J. R. Peterson, *Synth. Commun*. 1985, **15**, 1. [↑](#footnote-ref-9)
9. H. Fujihara, J. J. Chiu, N. Furukawa, *Bull. Chem. Soc. Jpn*. 1991, **64**, 699. [↑](#footnote-ref-10)
10. G. Crank, M. I. H. Makin, *Tetrahedron Lett.* 1979, **23**, 2169. [↑](#footnote-ref-11)
11. F. Jordan, Z. Kudzin, Z. Witczak, P. Hoops, *J. Org. Chem*. 1986, **51**, 571. [↑](#footnote-ref-12)
